# Supplementary material
Source: MDPI journal article supplement (https://www.mdpi.com/search?q=processes-08-00989)
Supplement: s001 [file processes-08-00989-s001.pdf]

# Tetracycline Induces the Formation of Biofilm of Bacteria from Different Phases of Wastewater Treatment

Tereza Stachurová <sup>1,\*</sup>, Kateřina Malachová <sup>1</sup>, Jaroslav Semerád <sup>2,3</sup>, Meta Sterniša <sup>4</sup>, Zuzana Rybková <sup>1</sup> and Sonja Smole Možina <sup>4</sup>

<sup>1</sup> Department of Biology and Ecology, Faculty of Science, University of Ostrava, Chittussiho 10, CZ-710 00 Ostrava, Czech Republic; katerina.malachova@osu.cz (K.M.); zuzana.rybkova@osu.cz (Z.R.)

<sup>2</sup> Institute of Microbiology of the Czech Academy of Sciences, Vídeňská 1083, CZ-142 20 Prague 4, Czech Republic; jaroslav.semerad@biomed.cas.cz

<sup>3</sup> Institute for Environmental Studies, Faculty of Science, Charles University, Benátská 2, CZ-128 01 Prague 2, Czech Republic

<sup>4</sup> Department of Food Science and Technology, Biotechnical Faculty, University of Ljubljana, Jamnikarjeva 101, SI-1000 Ljubljana, Slovenia; Meta.Sternisa@bf.uni-lj.si (M.S.); Sonja.Smole-Mozina@bf.uni-lj.si (S.S.M.)

\* Correspondence: stachurova.tereza@seznam.cz; Tel.: +420-732-676-234

**Table S1.** Concentration (ng/ $\mu$ L) and purity (A260/A280) of DNA samples from the wastewater of the nitrification and sedimentation tanks of the wastewater treatment plant for the quantification of antibiotic resistance genes.

| Sample | Wastewater                  |                  |                             |                  |
|--------|-----------------------------|------------------|-----------------------------|------------------|
|        | Nitrification tank          |                  | Sedimentation tank          |                  |
|        | Concentration (ng/ $\mu$ L) | Purity A260/A280 | Concentration (ng/ $\mu$ L) | Purity A260/A280 |
| 1      | 112.000                     | 1.998            | 30.900                      | 2.002            |
| 2      | 98.000                      | 2.000            | 14.800                      | 1.833            |
| 3      | 126.000                     | 1.965            | 17.200                      | 2.053            |
| 4      | 89.000                      | 1.876            | 21.600                      | 2.100            |
| 5      | 76.000                      | 1.997            | 22.300                      | 1.984            |
| 6      | 107.000                     | 2.005            | 34.100                      | 1.937            |

**Table S2.** Primers sequences and PCR and qPCR conditions used for detection and quantification of *tet* genes in wastewater samples and selected bacterial isolates.

| Primer               | Gene     | Sequence (5' to 3')                                              | PCR and qPCR conditions |        |                       |
|----------------------|----------|------------------------------------------------------------------|-------------------------|--------|-----------------------|
|                      |          |                                                                  | Annealing temp. (°C)    | Cycles | Reference             |
| F1048<br>R1194       | 16S rDNA | GTG STG CAY GGY TGT CGT CA<br>ACG TCR TCC MCA CCT TCC TC         | 60                      | 40     | Marti et al. 2013     |
| tet(A)-F<br>tet(A)-R | tetA     | CAG CCT CAA TTT CCT GAC GGG CTG<br>GAA GCG AGC GGG TTG AGA G     | 60                      | 45     | Boerjesson et al.2010 |
| tet(B)-F<br>tet(B)-R | tetB     | CAG CAA GTG CGC TTT GGA TGC TG<br>TGA GGT GGT ATC GGC AAT GA     | 60                      | 45     | Boerjesson et al.2010 |
| tet(M)-F<br>tet(M)-R | tetM     | GCA GAA TAT ACC ATT CAC ATC GAA GT<br>AAA CCA ATG GAA GCC CAG AA | 60                      | 40     | Rathnayake et al.2012 |
| tet(O)-F<br>tet(O)-R | tetO     | ACG GAR AGT TTA TTG TAT ACC<br>TGG CGT ATC TAT AAT GTT GAC       | 50                      | 40     | Marti et al. 2013     |
| tet(W)-F<br>tet(W)-R | tetW     | GAG AGC CTG CTA TAT GCC AGC<br>GGG CGT ATC CAC AAT GTT AAC       | 60                      | 40     | Marti et al. 2013     |

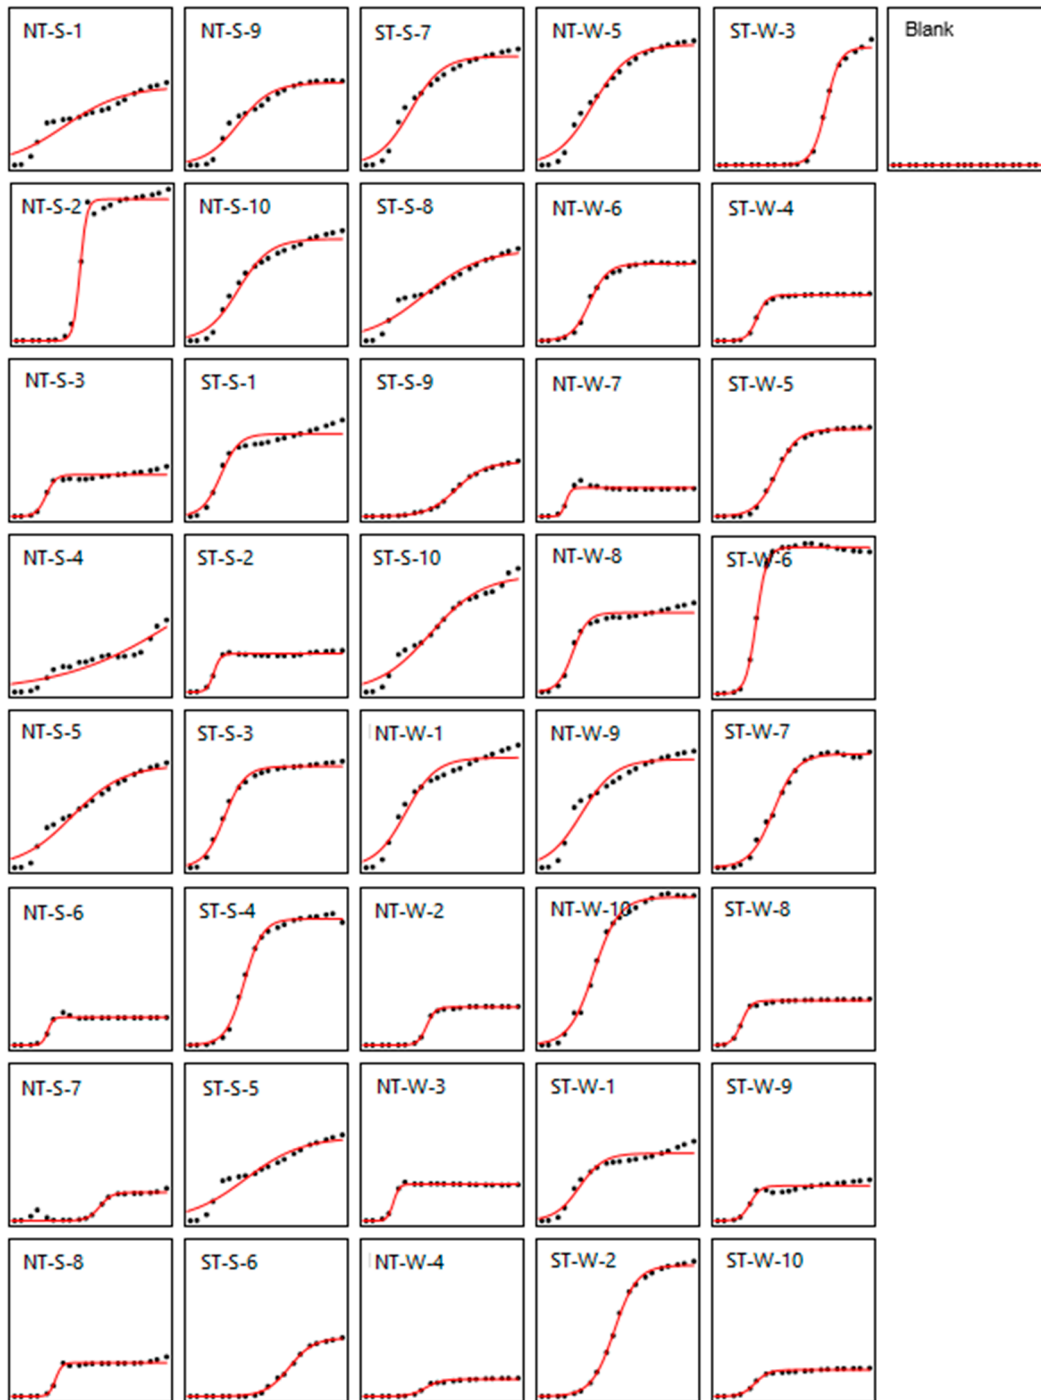

**Figure S1.** The growth curves of tetracycline-resistant isolates from the nitrification tank (NT) and the sedimentation tank (ST) of the wastewater treatment plant for the preparation of the hydrophobicity test. The growth curves measured every 30 min 24 h at 600 nm and 30 °C.

**Table S3.** The parameters of the growth curves of tetracycline-resistant isolates from the nitrification tank (NT) and the sedimentation tank (ST) of the wastewater treatment plant for the preparation of the hydrophobicity test. The growth curves measured every 30 min 24 h at 600 nm and 30 °C.

| Sample  | Growth rate (h) | lag phase (h)  | Doubling time (h) |
|---------|-----------------|----------------|-------------------|
| NT-S-1  | 0.220 ± 0.013   | 3.120 ± 0.114  | 3.157 ± 0.181     |
| NT-S-2  | 1.949 ± 0.063   | 9.236 ± 0.101  | 0.356 ± 0.076     |
| NT-S-3  | 1.356 ± 0.361   | 3.830 ± 0.293  | 0.534 ± 0.129     |
| NT-S-4  | 0.115 ± 0.028   | 3.476 ± 0.497  | 6.287 ± 0.534     |
| NT-S-5  | 0.252 ± 0.001   | 2.906 ± 0.211  | 2.752 ± 0.016     |
| NT-S-6  | 2.424 ± 0.053   | 4.739 ± 0.153  | 0.286 ± 0.006     |
| NT-S-7  | 1.094 ± 0.093   | 12.269 ± 0.334 | 0.637 ± 0.057     |
| NT-S-8  | 2.089 ± 0.142   | 5.802 ± 0.142  | 0.333 ± 0.023     |
| NT-S-9  | 0.392 ± 0.013   | 0.983 ± 0.750  | 1.768 ± 0.059     |
| NT-S-10 | 0.410 ± 0.008   | 1.177 ± 0.713  | 1.692 ± 0.035     |
| ST-S-1  | 0.717 ± 0.068   | 1.950 ± 0.421  | 0.972 ± 0.088     |
| ST-S-2  | 1.998 ± 0.046   | 3.012 ± 0.132  | 0.347 ± 0.008     |
| ST-S-3  | 0.633 ± 0.015   | 1.907 ± 0.295  | 1.096 ± 0.026     |
| ST-S-4  | 0.702 ± 0.013   | 5.621 ± 0.165  | 0.987 ± 0.018     |
| ST-S-5  | 0.228 ± 0.003   | 3.244 ± 0.124  | 3.034 ± 0.043     |
| ST-S-6  | 1.079 ± 0.322   | 11.532 ± 0.108 | 0.691 ± 0.247     |
| ST-S-7  | 0.405 ± 0.006   | 1.221 ± 0.508  | 1.711 ± 0.024     |
| ST-S-8  | 0.225 ± 0.003   | 3.386 ± 0.206  | 3.075 ± 0.034     |
| ST-S-9  | 0.430 ± 0.163   | 9.512 ± 0.169  | 1.750 ± 0.544     |
| ST-S-10 | 0.247 ± 0.004   | 2.996 ± 0.112  | 2.806 ± 0.047     |
| NT-W-1  | 0.425 ± 0.027   | 0.744 ± 0.804  | 1.636 ± 0.108     |
| NT-W-2  | 1.539 ± 0.051   | 8.402 ± 0.077  | 0.451 ± 0.015     |
| NT-W-3  | 2.290 ± 0.025   | 3.749 ± 0.059  | 0.303 ± 0.003     |
| NT-W-4  | 0.824 ± 0.026   | 6.960 ± 0.268  | 0.842 ± 0.027     |
| NT-W-5  | 0.358 ± 0.003   | 0.807 ± 0.558  | 1.934 ± 0.017     |
| NT-W-6  | 0.744 ± 0.128   | 4.693 ± 0.176  | 0.950 ± 0.157     |
| NT-W-7  | 2.618 ± 0.181   | 3.250 ± 0.179  | 0.266 ± 0.018     |
| NT-W-8  | 0.872 ± 0.050   | 2.756 ± 0.343  | 0.796 ± 0.048     |
| NT-W-9  | 0.384 ± 0.011   | 3.531 ± 0.254  | 1.808 ± 0.053     |
| NT-W-10 | 0.517 ± 0.021   | 3.956 ± 0.277  | 1.343 ± 0.053     |
| ST-W-1  | 0.534 ± 0.066   | 1.520 ± 0.785  | 1.313 ± 0.172     |
| ST-W-2  | 0.569 ± 0.005   | 7.681 ± 0.146  | 1.218 ± 0.011     |
| ST-W-3  | 0.922 ± 0.084   | 12.902 ± 0.415 | 0.752 ± 0.014     |
| ST-W-4  | 1.300 ± 0.010   | 4.807 ± 0.113  | 0.533 ± 0.004     |
| ST-W-5  | 0.616 ± 0.003   | 5.762 ± 0.156  | 1.125 ± 0.005     |
| ST-W-6  | 1.245 ± 0.071   | 4.379 ± 0.061  | 0.557 ± 0.062     |
| ST-W-7  | 0.553 ± 0.014   | 4.881 ± 0.124  | 1.254 ± 0.032     |
| ST-W-8  | 1.384 ± 0.078   | 2.754 ± 0.143  | 0.502 ± 0.028     |
| ST-W-9  | 1.288 ± 0.078   | 4.145 ± 0.355  | 0.540 ± 0.033     |
| ST-W-10 | 0.976 ± 0.077   | 4.041 ± 0.234  | 0.713 ± 0.057     |

**Table 4.** Efficiency of qPCR assays retrieved from standard curves.

| qPCR assay  | Efficiency (%) | R <sup>2</sup> | Limit of quantification (copy number) |
|-------------|----------------|----------------|---------------------------------------|
| rDNA        | 97.470         | 0.996          | 24.280                                |
| <i>tetW</i> | 99.050         | 0.998          | 23.400                                |
| <i>tetB</i> | 97.390         | 0.998          | 27.710                                |
